# Supplementary figures and images for: TCF7L2 activation is required for myelin regeneration in 5-FU-induced demyelinating mice
Source: Royal Society of Chemistry journal article supplement (doi:10.1039/c5tx00110b), 2015-01-01

Figure S1

CC1

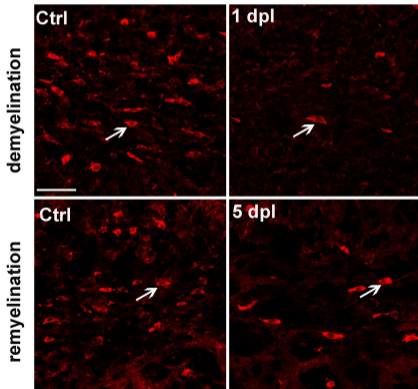

Supplement: c5tx00110b1.pdf [file c5tx00110b1.pdf]
